# Supplementary material for: Restoring mitochondrial DNA copy number preserves mitochondrial function and delays vascular aging in mice
Source: PubMed Central journal article supplement (PMC6052475; doi:10.1111/acel.12773), 2018-05-09
Supplement: ACEL-17-na-s001.pdf [file ACEL-17-na-s001.pdf]

## Supporting Information

### Figure S1. Ultrasound imaging of carotid artery in mice

Cross section (left) and longitudinal (below right) ultrasound images of the mouse common carotid artery and bifurcation. RCCA; right common carotid artery, LCCA; left common carotid artery. Scale bars 1 mm. M-mode (below left) of mouse right common carotid artery demonstrating systolic and diastolic diameters.

#### Diameters (M-mode)

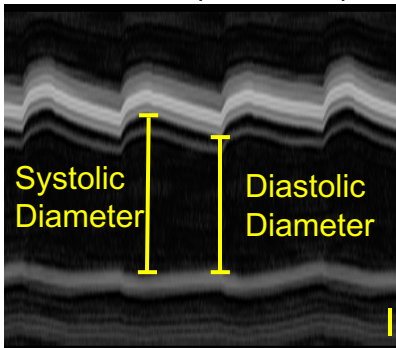

#### Cross Section

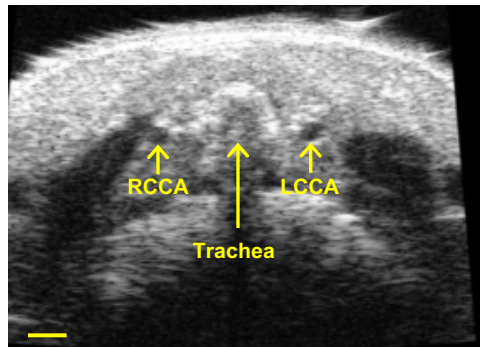

#### Longitudinal

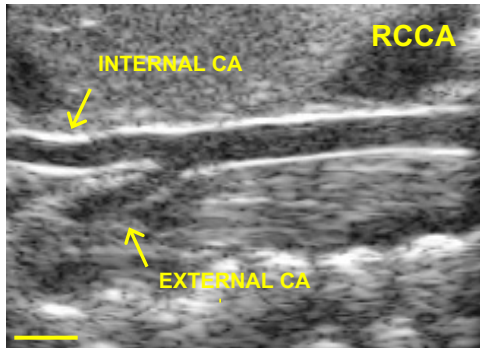

### Figure S2. Measurement of pulse wave velocity in mice using a dual sensor pressure catheter

A dual sensor pressure catheter is inserted into the aorta via the left femoral artery, with simultaneous recordings taken from the descending thoracic aorta (blue circle; proximal sensor S1) and the abdominal aorta (green circle; distal sensor S2). PWV is calculated using the transit time (t) between pressure waves at the two sites and the distance (D) between sensors.

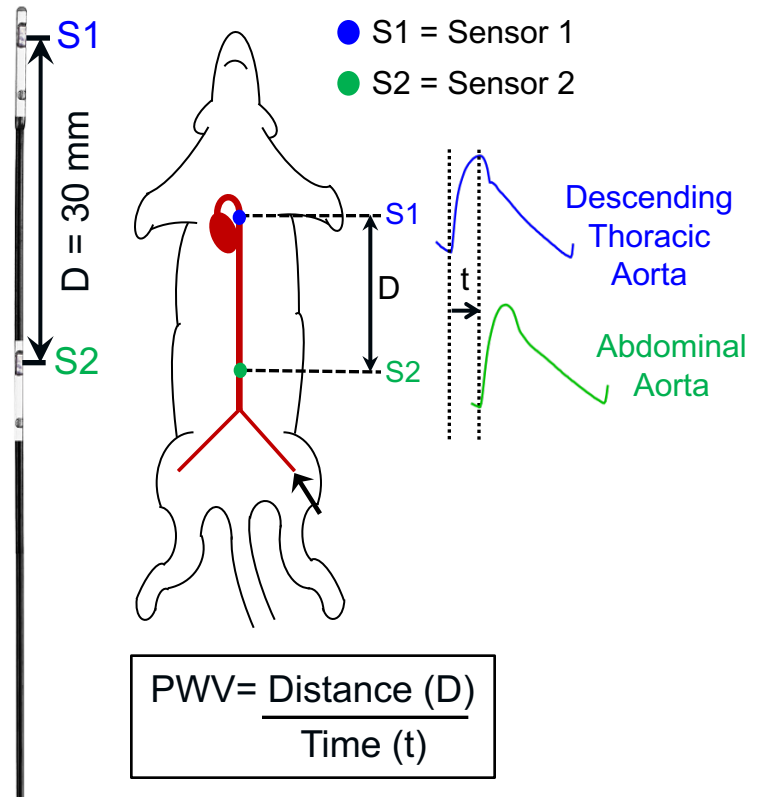

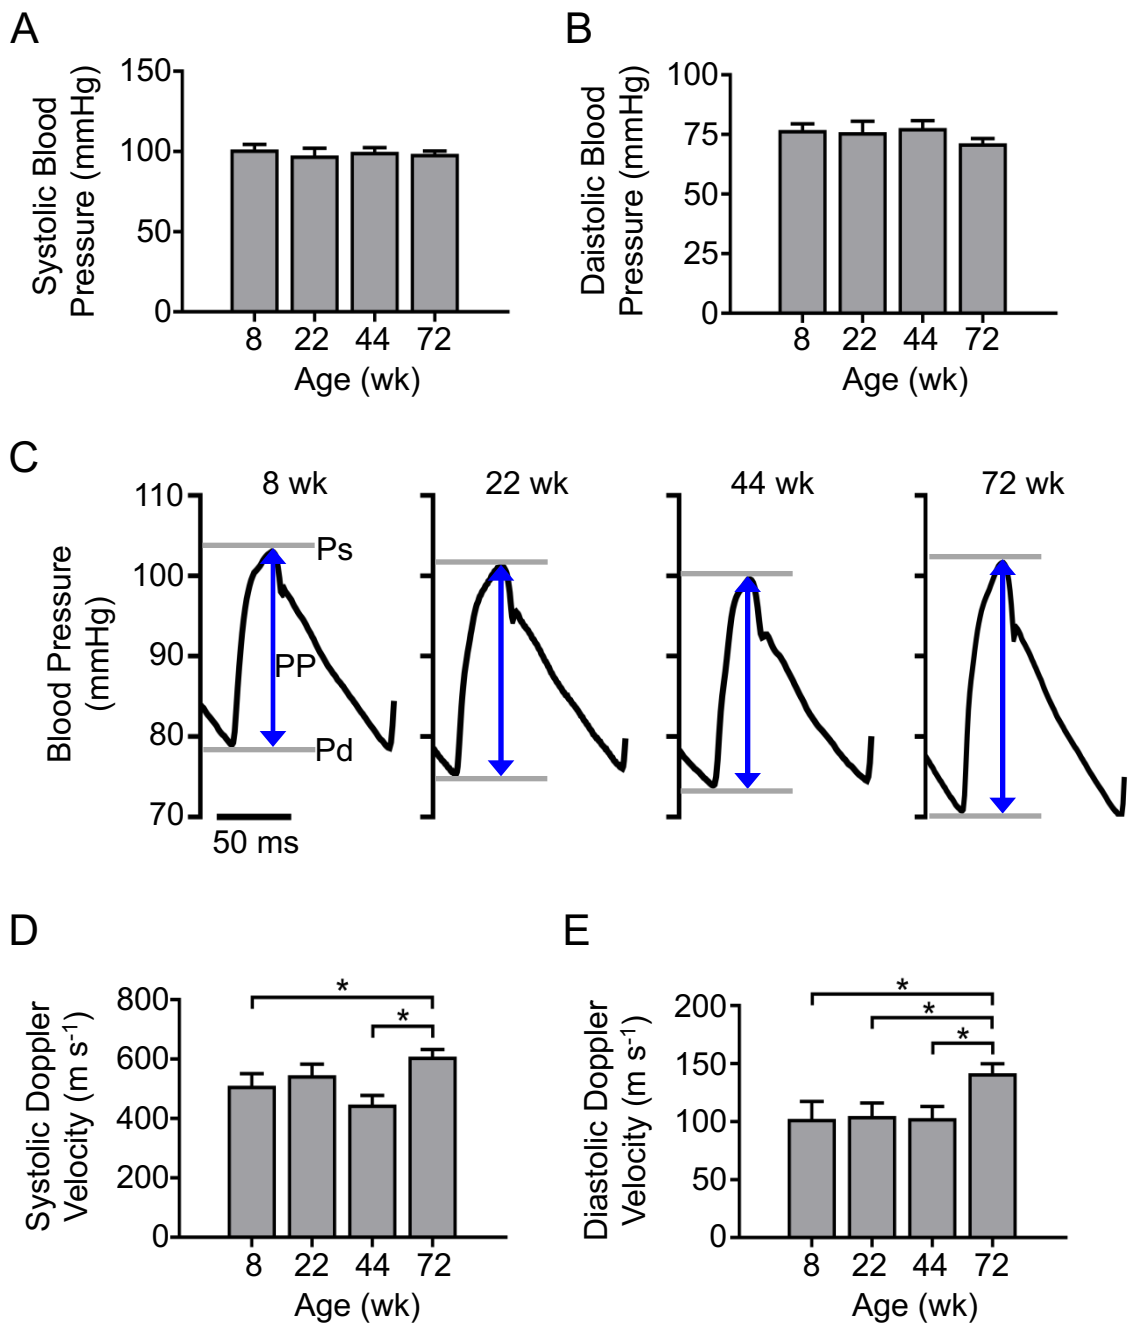

**Figure S3. Blood pressure, pulse pressure and Doppler velocities in mice aged 8-72 wk**  
**(A-B)** Mean systolic and diastolic pressures, **(C)** Representative pressure traces indicating peak systolic pressure (Ps), diastolic pressure (Pd), and pulse pressure (PP = Ps-Pd; blue arrows), and **(D-E)** Doppler flow velocities in WT mice aged 8-72 wk (n=10-17). Data are means  $\pm$  SEM. \* $p < 0.05$  using ANOVA with Tukey post-test.

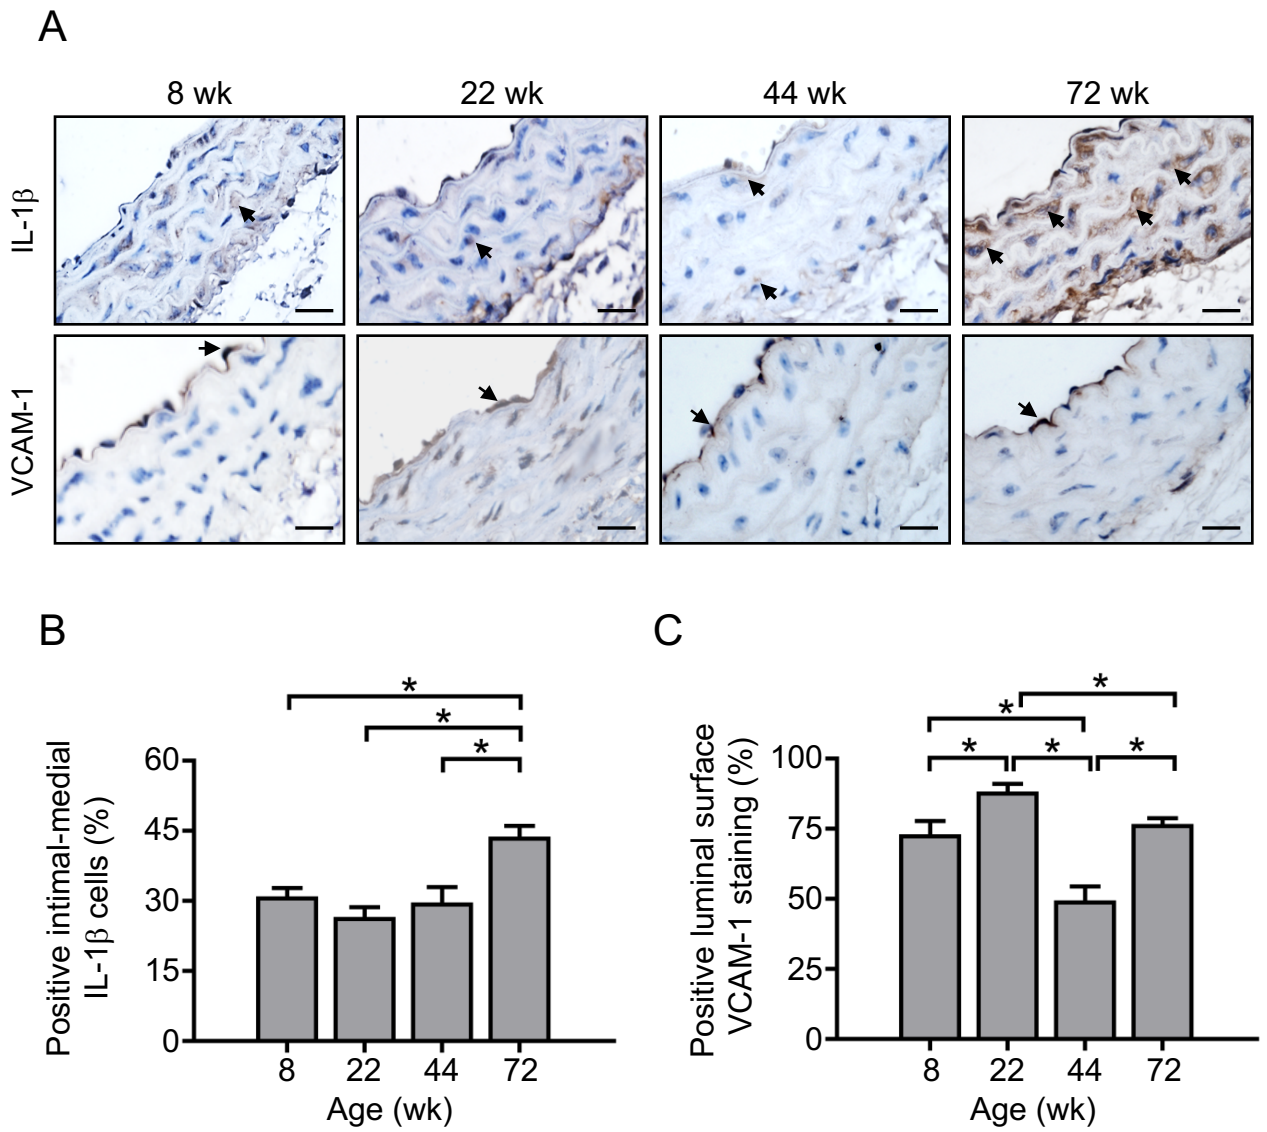

**Figure S4. Markers of inflammation in aortas from mice aged 8-72 wk**

(A) Representative images of aortas from WT mice aged 8-72 wk stained for IL-1 $\beta$  or VCAM-1, and (B-C) associated quantification of positive staining. Scale bars 25  $\mu$ M. Black arrows indicate positive staining (n=3-4 mice). Data are means  $\pm$  SEM. \*p<0.05 using ANOVA with Tukey post-test.

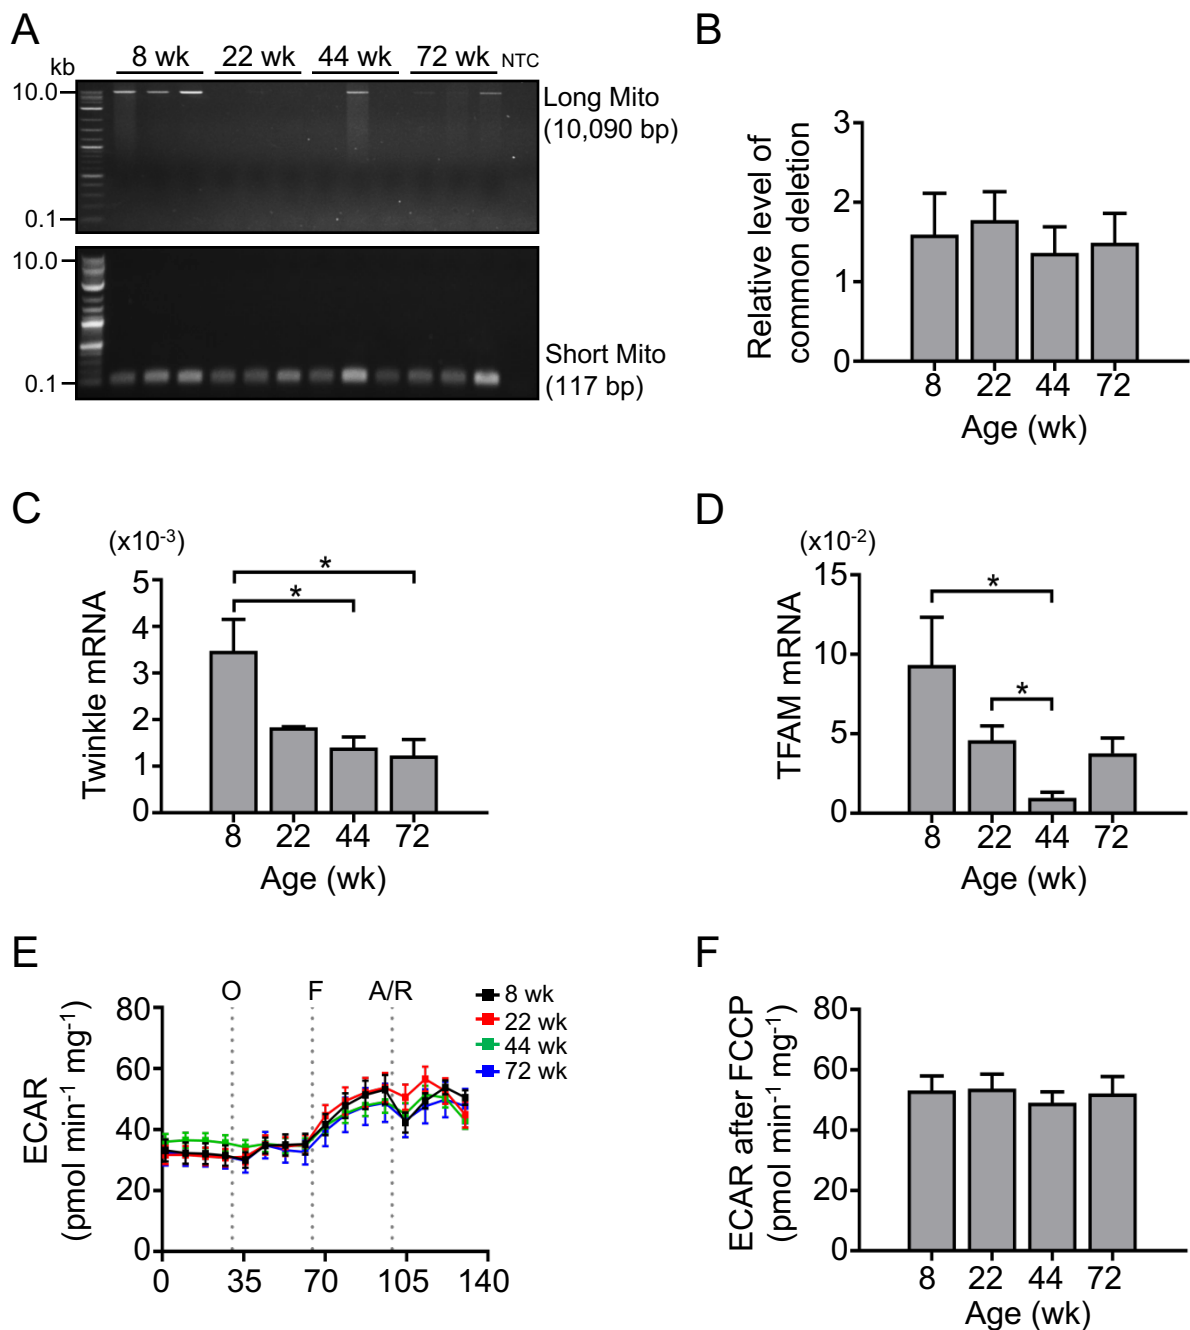

**Figure S5. MtDNA damage, gene expression of mtCN regulators and ECAR in aortas from mice aged 8-72 wk**

(A) Long and short segment mtDNA PCR products from 8-72 wk aortas run on 0.8% agarose gel for size confirmation only. NTC; no template control, (B) qPCR for the mtDNA ‘common’ deletion in aortas from mice aged 8-72 wk, (C-D) Quantification of *Twinkle* and *TFAM* mRNA in WT mice aged 8-72 wk (n=2-3 mice) and (E-F) Extracellular acidification rate (ECAR) indicating injection of the compounds (grey dotted lines) oligomycin (O), FCCP (F) and antimycin A and rotenone (A/R) with associated quantification after FCCP in mice from 8-72 wk (n=3 mice). Data are means  $\pm$  SEM. \*p<0.05 using ANOVA with Tukey post-test.

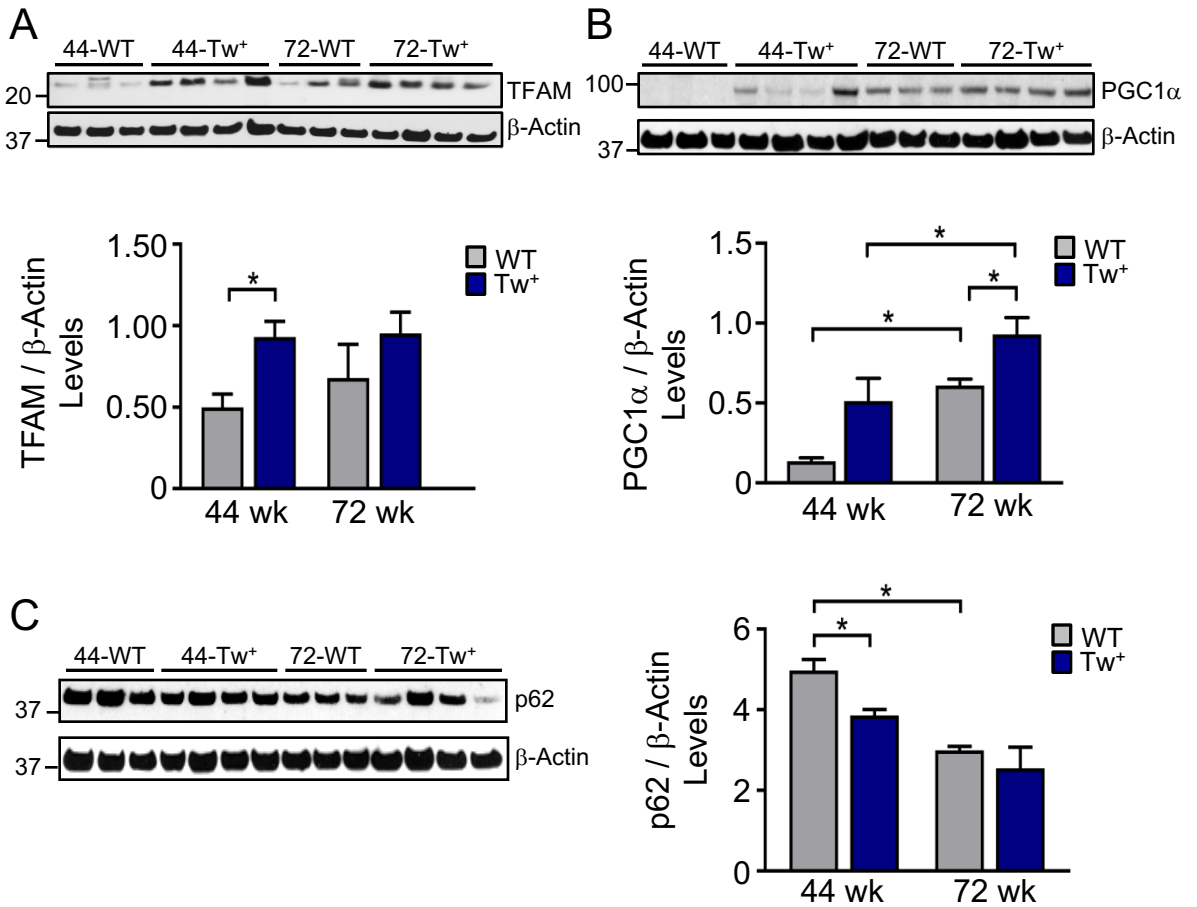

**Figure S6. Tw<sup>+</sup> mice have increased vascular TFAM, increased PGC1 $\alpha$  and reduced p62 expression**  
**(A)** Western blot of TFAM, **(B)** PGC1 $\alpha$  and **(C)** p62 in WT and Tw<sup>+</sup> mice at 44-72 wk with quantification of respective relative levels (n=3-4). WT (grey labels); Tw<sup>+</sup> (blue labels). Data are means  $\pm$  SEM. \*p<0.05 using ANOVA with Tukey post-test.
